# Supplementary material for: ‘Real-life experience’: recurrence rate at 3 years with Hexvix® photodynamic diagnosis-assisted TURBT compared with good quality white light TURBT in new NMIBC—a prospective controlled study
Source: PubMed Central journal article supplement (PMC5693980; doi:10.1007/s00345-017-2077-6), 2017-08-12

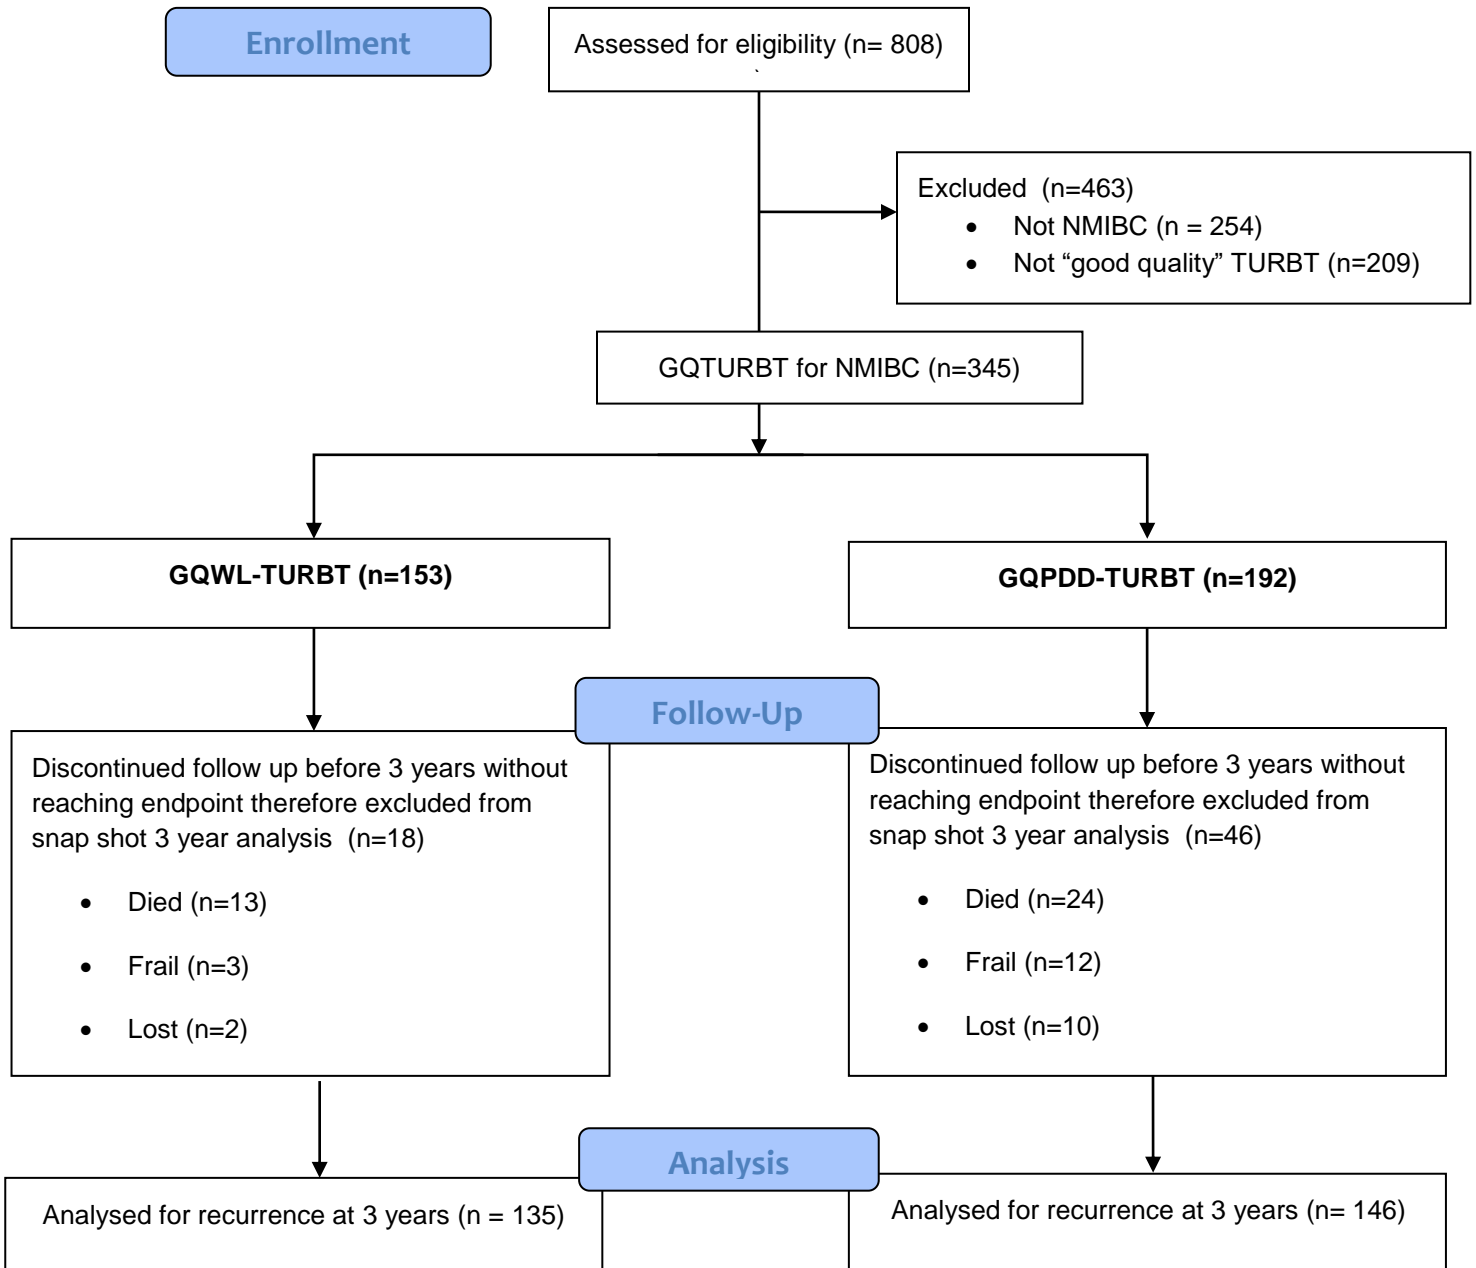

Supplement: 345_2017_2077_MOESM2_ESM.pdf [file 345_2017_2077_MOESM2_ESM.pdf]
