# Supplementary material for: ‘Real-life experience’: recurrence rate at 3 years with Hexvix® photodynamic diagnosis-assisted TURBT compared with good quality white light TURBT in new NMIBC—a prospective controlled study
Source: Springer Nature journal article supplement (doi:10.1007/s00345-017-2077-6), 2017-08-12
Supplement: MOESM1 [file 14212926]

Department of Urology, Western General Hospital, Edinburgh  
Bladder cancer operation notes / proforma Ver. 2

|                  |
|------------------|
| Name:            |
| DOB:             |
| CHI Number:      |
| Hospital Number: |

Date:

Consultant:

**Operation:**

**Anaesthesia:**

**Surgeon:**

**Anaesthetist: Dr.**

Indication: First cystoscopy / new tumour / recurrence / check

Findings (delete or circle accordingly):

**Tumour number:** 1 2 3 >3

**Appearance:** papillary / solid / mixed  
Red patch

**Size of largest tumour (mm):**  
<5 5-10 10-30 >30

**Site(s):**

R UO L UO Trigone Bl. neck

posterior wall anterior wall

R lateral wall L lateral wall

Anterior wall Dome Diverticulum

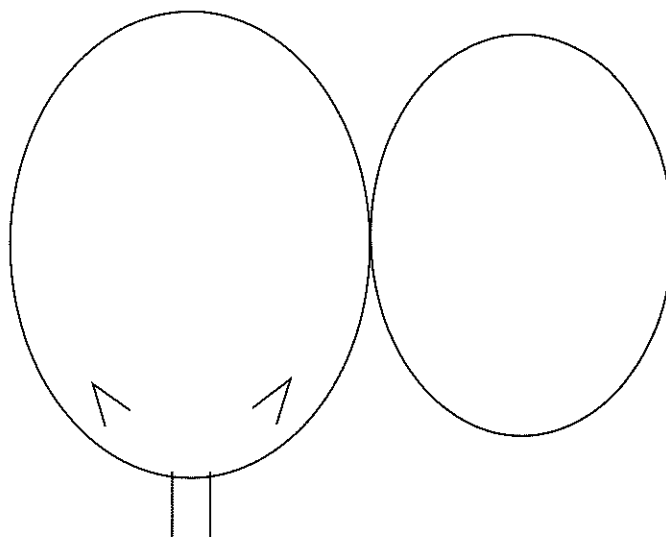

**Complete resection:** yes / no / not sure / Biopsy and diathermy only

**Extra-peritoneal perforation:** yes / no / thin wall / Cystoscopy only

**EUA:** (1) cT1 cT2 cT3 cT4 (2) Bladder mobile: yes / no / not sure

- Postoperative Instructions:**
- (1) Irrigation: yes / no
  - (2) Intravesical 40mg Mitomycin C within 6 hours: yes / no
  - (3) TWOC after 24H: yes / no If **no** keep catheter for \_\_\_\_ days
  - (4) MDT discussion: yes / no If **yes** please complete yellow form
  - (5) Needs imaging: yes / no If **yes**, please specify:
  - (6) Other:

- Follow up (Please tick):**
- (1)  GA cystoscopy urgent / in 6 weeks / in 3 months
  - (2)  GA cystoscopy + Biopsy / diathermy (urgent)
  - (3)  TURBIT (urgent)
  - (4)  Flexible cystoscopy in 3 months
  - (5)  Pending MDT histology and MDT decision

Signature + initials:
